# Supplementary material
Source: PubMed Central journal article supplement (PMC3663499)
Supplement: supp_M113.468645_jbc.M113.468645-1.pdf [file supp_M113.468645_jbc.M113.468645-1.pdf]

## SUPPLEMENTAL DATA

### THE *sld* GENETIC DEFECT: INTRONIC INSERTION OF TWO CA-REPEATS THAT PROMOTE INSERTION OF THE SUBSEQUENT INTRON AND mRNA DECAY

Biswadip Das, Melanie N. Cash, Bently Robinson, Christopher S. Kuhns, Lisa R. Latchney, Margaret A. Fallon, Rosemary W. Elliott, Arther R. Hand, David J. Culp

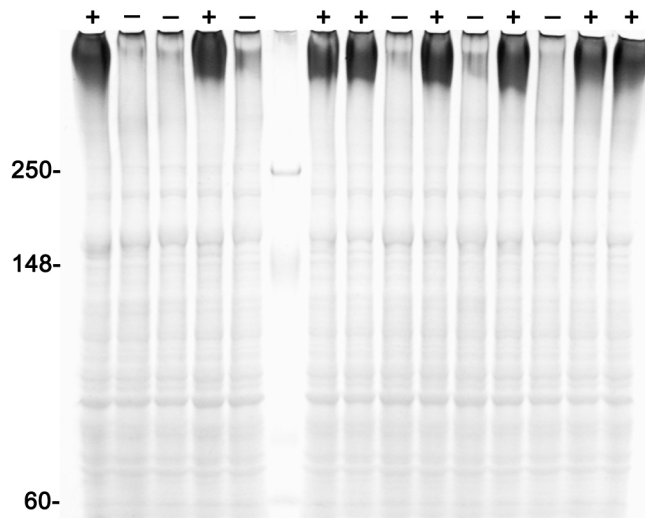

**Figure 1S.** Mapping the *sld* mutation: Phenotyping mice. To identify the *sld* mutant phenotype, we prepared homogenates from frozen excised sublingual glands of F2 mice killed at 3 weeks of age. Homogenates were assayed for the presence or near absence (mutant phenotype) of high molecular weight mucins by SDS-PAGE on gradient gels (3% - 8%). Gels were stained using Alcian blue with subsequent silver enhancement of dye staining. Lane 6 contains molecular weight markers with size (kd) indicated at far left. *sld* phenotype, -; wild type phenotype, +.

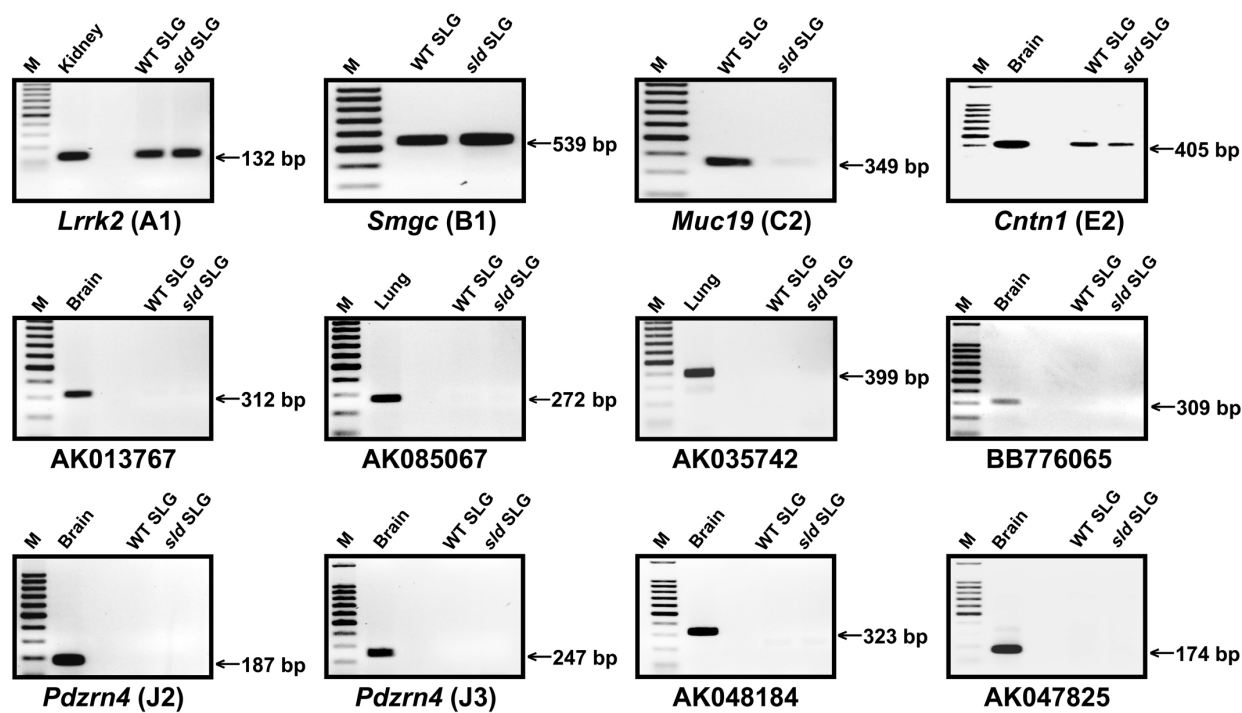

**Figure 2S.** Expression of transcripts within the critical interval in sublingual glands of wild type (WT) and *sld* mutant mice as assessed by RT-PCR. Top row are representative gels from known genes within the critical interval. Bottom two rows are results for EST-based transcripts and *Pdzn4*, all of which consistently displayed no expression in sublingual glands. In parentheses is the primer set identification for transcripts with more than one amplicon (see Supplemental Table S4). Control tissues other than sublingual glands are identified. SLG, sublingual gland.

**Table 1S.** Sequence Tagged Sites (STS) used in chromosomal localization of the *sld* mutation. Sequences of primers for each STS marker are available from the UniSTS database (<http://www.ncbi.nlm.nih.gov/entrez/query.fcgi?db=unists>). The total length of each chromosome (Chr) and the positions of STS markers are given in centiMorgans (cM, MGI genetic map position) and in mega-base pairs (Mbp) based on the NCBI genomic sequence, Build 36.1. CAST, CAST/EiJ mouse strain; *sld*, NFS/N-*sld* mouse strain; bp, base pair. \*, D6Mit42 has multiple alignments in a highly repetitive region of 100 kb.

| Chr (cM)<br>[Mbp]  | STS (cM, Mbp)           | Product (bp) |            | Chr (cM)<br>[Mbp]  | STS (cM, Mbp)           | Product (bp) |            |
|--------------------|-------------------------|--------------|------------|--------------------|-------------------------|--------------|------------|
|                    |                         | CAST         | <i>sld</i> |                    |                         | CAST         | <i>sld</i> |
| 1 (127.5)<br>[197] | D1Mit171 (20.2, 36.7)   | 184          | 150        | 10 (77.5)<br>[130] | D10Mit4 (19.0, 25.7)    | 147          | 134        |
|                    | D1Mit7 (41.0, 74.9)     | 152          | 105        |                    | D10Mit226 (43.0, 79.7)  | 172          | 95         |
|                    | D1Mit140 (70.0, 136.1)  | 158          | 150        |                    | D10Mit121 (62.0, 114.4) | 217          | 190        |
|                    | D1Mit116 (100.5, 180.2) | 176          | 146        | 11 (80.0)<br>[122] | D11Mit268 (19.0, 40.7)  | 112          | 142        |
| 2 (115.0)<br>[182] | D2Mit33 (17.0, 30.4)    | 384          | 182        |                    | D11Mit35 (47.6, 83.5)   | 234          | 216        |
|                    | D2Mit247 (44.0, 74.9)   | 142          | 121        |                    | D11Mit253 (71.0, 114.1) | 115          | 85         |
|                    | D2Mit484 (65.5, 118.3)  | 146          | 124        | 12 (67.0)<br>[120] | D12Mit2 (19.0, 36.0)    | 178          | 149        |
|                    | D2Mit170 (96.0, 162.3)  | 129          | 141        |                    | D12Mit116 (35.0, 80.9)  | 88           | 115        |
| 3 (120.0)<br>[160] | D3Mit333 (22.0, 44.4)   | 144          | 126        |                    | D12Mit100 (50.0, 104.9) | 111          | 91         |
|                    | D3Mit104 (52.5, 107.9)  | 118          | 90         | 13 (80.0)<br>[121] | D13Mit38 (19.0, 37.7)   | 156          | 145        |
|                    | D3Mit219 (84.9, 154.9)  | 203          | 151        |                    | D13Mit27 (42.0, 88.2)   | 186          | 205        |
| 4 (84.0)<br>[155]  | D4Mit214 (17.9, 45.7)   | 154          | 129        |                    | D13Mit76 (61.0, 111.7)  | 118          | 90         |
|                    | D4Mit297 (38.0, 80.7)   | 136          | 115        | 14 (69.5)<br>[124] | D14Mit26 (19.5, 54.2)   | 142          | 126        |
|                    | D4Mit68 (66.0, 136.4)   | 130          | 102        |                    | D14Mit32 (32.5, 69.3)   | 270          | 235        |
| 5 (93.0)<br>[152]  | D5Mit4 (20.0, 35.9)     | 238          | 195        |                    | D14Mit9 (54.5, 111.8)   | 244          | 237        |
|                    | D5Mit89 (53.0, 100.5)   | 180          | 148        | 15 (81.5)<br>[103] | D15Mit165 (21.1, 38.0)  | 166          | 144        |
|                    | D5Mit32 (78.0, 136.2)   | 148          | 124        |                    | D15Mit2 (46.9, 80.1)    | 107          | 84         |
| 6 (75.0)<br>[150]  | D6Mit42 (20.4, 47.6*)   | 168          | 178        |                    | D15Mit42 (59.2, 98.9)   | 170          | 184        |
|                    | D6Mit36 (46.0, 104.5)   | 178          | 195        | 16 (72.0)<br>[98]  | D16Mit103 (22.2, 31.9)  | 123          | 103        |
|                    | D6Mit111 (63.7, 133.8)  | 180          | 150        |                    | D16Mit64 (38.0, 57.5)   | 245          | 220        |
|                    | D6Mit15 (74.0, 146.4)   | 220          | 150        |                    | D16Mit6 (63.2, 89.2)    | 171          | 185        |
| 7 (75.4)<br>[145]  | D7Mit69 (24.5, 48.9)    | 274          | 234        | 17 (82.0)<br>[95]  | D17Mit21 (18.6, 38.9)   | 105          | 122        |
|                    | D7Mit281 (52.4, 112.0)  | 207          | 139        |                    | D17Mit203 (34.3, 59.4)  | 158          | 122        |
|                    | D7Mit177 (72.0, 143.8)  | 161          | 136        |                    | D17Mit190 (54.6, 85.6)  | 121          | 110        |
| 8 (82.0)<br>[132]  | D8Mit63 (15.0, 34.3)    | 244          | 222        | 18 (60.0)<br>[91]  | D18Mit104 (20.0, 42.0)  | 159          | 135        |
|                    | D8Mit252 (43.0, 93.8)   | 138          | 166        |                    | D18Mit152 (37.0, 62.1)  | 124          | 145        |
|                    | D8Mit13 (67.0, 126.7)   | 114          | 98         |                    | D18Mit25 (57.0, 89.7)   | 146          | 128        |
| 9 (79.5)<br>[124]  | D9Mit2 (17.0, 37.1)     | 159          | 182        | 19 (56.0)<br>[61]  | D19Mit73 (22.0, 24.1)   | 166          | 141        |
|                    | D9Mit8 (42.0, 76.2)     | 180          | 194        |                    | D19Mit11 (41.0, 44.4)   | 118          | 150        |
|                    | D9Mit16 (61.0, 114.8)   | 194          | 178        |                    |                         |              |            |

**Table 2S.** Sequence Tagged Sites (STS) derived from genomic sequence between D15Mit34 and D15Mit223. The position in mega-base pairs (Mbp) of each STS on chromosome 15 is given in parentheses and is based on NCBI genomic sequence, Build 36.1, released February 2006. PCR reactions (20  $\mu$ l) contained 50 ng genomic DNA (DNeasy Kit, Qiagen), 50 ng primers and 10  $\mu$ l Taq Polymerase Master Mix kit (Qiagen) with a cycling profile of 95°C for 5 min, 35 cycles (95°C, 30 sec; 55°C, 120 sec; 72°C, 120 sec) and 7 min at 72°C. Products were analyzed on 4% gels (NuSieve 3:1 agarose; Cambrex Bio Science). bp, base pair.

| STS (Mbp)         | GenBank Accession Number | Forward/Reverse Primers                                                 | PCR Product (bp) |                   |
|-------------------|--------------------------|-------------------------------------------------------------------------|------------------|-------------------|
|                   |                          |                                                                         | CAST/EiJ         | NFS/N- <i>sld</i> |
| D15Roc1 (91.159)  | GI:154937296             | 5'-CCTGATGCTGGAGATGACAAATTC-3'<br>5'-GGCAGAAATGAGAGGGAGATTGAG-3'        | 231              | 201               |
| D15Roc2 (91.408)  | GI:154937297             | 5'-GGAGCCAGAAGATTAACAGATGC-3'<br>5'-GCTCAAACCTCTCCACACTAACTG-3'         | 266              | 195               |
| D15Roc3 (91.609)  | GI:154937298             | 5'-TTTTAGTCCCAATGTTTCCCATCAC-3'<br>5'-CCAAGCACAAGAATACACAGACGC-3'       | 325              | 283               |
| D15Roc4 (91.631)  | GI:154937299             | 5'-TCCTGACTTCTGCTGCTTGCTATTG-3'<br>5'-TGGTGCTATATTGATGTCTGCATTCAAG-3'   | 328              | 300               |
| D15Roc5 (91.700)  | GI:154937300             | 5'-GGCTGCTTTGCTTTCAGTTTTGTAG-3'<br>5'-CCCAGTTACTAAGTGGTTTTTTGCTTG-3'    | 290              | 200               |
| D15Roc6 (91.763)  | GI:154937301             | 5'-GCACAAAGGTGGATGGATTG-3'<br>5'-TCAAGGTAGAAGAAAGAGGCAAG-3'             | 275              | 224               |
| D15Roc7 (91.890)  | GI:154937302             | 5'-CAGATCCTCACAAGGCTTTTGACAG-3'<br>5'-CATAATTTCTCCCTTTCCTCCTTCC-3'      | 320              | 370               |
| D15Roc8 (92.215)  | GI:154937303             | 5'-GGTTCCTCAACCATTTGCTTTTCAG-3'<br>5'-AACAATCCAAGGAGAGAGAGAGGGAG-3'     | 89               | 171               |
| D15Roc9 (92.392)  | GI:154937304             | 5'-GGTCCTATTCCTACATTCTCAGTTTTG-3'<br>5'-CCCACCACACAGGTTTTTCTGAAAG-3'    | 192              | 175               |
| D15Roc10 (92.456) | GI:154937307             | 5'-ATGGTGTTC AAGAGTCTCAGTAAGCAAC-3'<br>5'-TGAGGCAGGAGGATTGTGGTTGAG-3'   | 260              | 237               |
| D15Roc11 (92.533) | GI:154937306             | 5'-TGTTTCGGTTGCCTGTTACAGAAGTG-3'<br>5'-GTGCATTACACACAAGGAAACTCGTC-3'    | 287              | 334               |
| D15Roc12 (92.638) | GI:154937305             | 5'-ATCACCAGGGTCTAGACTTTCTGTATC-3'<br>5'-TGACAACGGGTCATCAATATGTTAATTG-3' | 220              | 176               |

**Table 3S.** RT-PCR primers used to detect transcripts within the critical interval. Known transcripts and computer models are identified by their official symbol from NCBI Entrez Gene (<http://www.ncbi.nlm.nih.gov/entrez/query.fcgi?db>) whereas ESTs are identified by their locus designation from NCBI Entrez Nucleotide (<http://www.ncbi.nlm.nih.gov/entrez/viewer.fcgi?db>). The positions of primers is based the GenBank Accession Number (given in parentheses or the EST designation). Amp ID, amplicon identification; Amp (bp), amplicon length in base pairs; Binding Site, location in which primer binds; PCR, three different PCR cycling profiles (A - C) were incorporated to amplify cDNA (10 ng): A, 95°C for 15 min, 25 cycles (94°C, 60 sec; 55°C, 60 sec; 72°C, 60 sec) and 10 min extension at 72°C; B and C, same as A but for 30 and 35 cycles, respectively; *Lrrk2*, leucine-rich repeat kinase 2; *Muc19*, mucin 19; *Smgc*, submandibular gland protein C; *Cntn1*, contactin 1 *Pdzn4*, PDZ domain containing RING finger 4.

| Transcript                  | Primer Sequence                     | Binding Site | Amp ID | Amp (bp) | PCR |
|-----------------------------|-------------------------------------|--------------|--------|----------|-----|
| <i>Lrrk2</i><br>(NM_025730) | 5'-GCCACATCTTACTCCTGGATCTTTC-3'     | Exon 49      | A1     | 132      | B   |
|                             | 5'-TGTACCCCAAACCAGCATGAC-3'         | Exon 50      |        |          |     |
|                             | 5'-GGAGGAGGTTCTGAGAAGTTGATAG-3'     | Exon 1       | A2     | 361      | B   |
|                             | 5'-GACAGGTTTACATTGGCGTGATG-3'       | Exon 4       |        |          |     |
| <i>Smgc</i><br>(NM_198927)  | 5'-TAATGCACAATCAAGCAACAAC-3'        | Exon 14      | B1     | 539      | A   |
|                             | 5'-AATTATGGCTTCCTGAGTCACTC-3'       | Exons 17/18  |        |          |     |
|                             | 5'-GCTCCTCAGCAGTAGACTCCACAG-3'      | Exon 17      | B2     | 241      | A   |
|                             | 5'-GGGTCAGCAGGTTTCGTTTTTG-3'        | Exon 18      |        |          |     |
| <i>Muc19</i><br>(NM_207243) | 5'-CATCTCAGGAATGTTTCAGACACAGTAAC-3' | Exon 25      | C1     | 288      | A   |
|                             | 5'-CAGGGCAGAGGTTTGGCTTTC-3'         | Exons 26/27  |        |          |     |
|                             | 5'-GATTATGCGATTGGTTCATCCT-3'        | Exons 39/40  | C2     | 349      | A   |
|                             | 5'-GTGCAATGTCCCTGAATCATA-3'         | Exon 43      |        |          |     |
| LOC667753<br>(XM_992195)    | 5'-TGCCTCTGCGAGGAAAGTTG-3'          | Exon 1       | D1     | 143      | B   |
|                             | 5'-GCGACACCTATGACACCAATCAG-3'       | Exon 1       |        |          |     |
| <i>Cntn1</i><br>(NM_007727) | 5'-GCCAGCCATTTCAGTTTAC-3'           | Exon 4       | E1     | 378      | B   |
|                             | 5'-GCCGTTGGTCTGAGACACAAATC-3'       | Exon 7       |        |          |     |
|                             | 5'-CCAATCAATGCTGACATCACTGTTG-3'     | Exon 14      | E2     | 405      | B   |
|                             | 5'-CGTCTTGGTCTGGATCGTGTATTTAG-3'    | Exon 16      |        |          |     |
| AK035742                    | 5'-GATGTAGGCAGGGGACTGATAGTTC-3'     | Exon 1       | F1     | 399      | C   |
|                             | 5'-CCCTAACGGTGTGATAATGCTCC-3'       | Exon 3       |        |          |     |
| AK013767                    | 5'-GCCTCCTTTGTCTTGTGTTGCTGAC-3'     | Exon 1       | G1     | 312      | B   |
|                             | 5'-GGAGATTGATGCTTTCTTTTGGC-3'       | Exon 1       |        |          |     |
| AK085067                    | 5'-GCAAGAGCGAAAATGGCAAAAC-3'        | Exon 1       | H1     | 272      | B   |
|                             | 5'-TCCCAGGCACTAAACCACCAAC-3'        | Exon 1       |        |          |     |
| BB776065                    | 5'-CACCTAGAAGGGTGTGAACACGG-3'       | Exon 1       | I1     | 309      | B   |
|                             | 5'-GGAGGCTGTGGGCTTCATATTG-3'        | Exon 1       |        |          |     |

**Table 3 S continued**

|                                |                                      |                           |         |     |     |
|--------------------------------|--------------------------------------|---------------------------|---------|-----|-----|
| <i>Pdzrn4</i><br>(XM_992218)   | 5'-TCTGGTTGTCGCCTGCTGTC-3'           | Exon 1                    | J1      | 212 | B   |
|                                | 5'-TCCTATTATGTTGAATCCCAAAGTGTC-3'    | Exon 3                    |         |     |     |
|                                | 5'-CCGTTCACTGTTGTGTTGGAAAG-3'        | Exon 3                    | J2      | 187 | B   |
|                                | 5'-GCCTTACCGCAATGATTTTGTC-3'         | Exon 4                    |         |     |     |
|                                | 5'-GAGCCCATAGTGGTACAGGTGTTAAG-3'     | Exon 5                    | J3      | 247 | B   |
|                                | 5'-AGACGTACTIONCATGGTCTTCATAAAACC-3' | Exon 6                    |         |     |     |
|                                | 5'-AAGAAGACACGGGCATTTATG-3'          | Exon 7                    | J4      | 256 | C   |
|                                | 5'-CATTCACTCACGAACTTGGTG-3'          | Exon 9                    |         |     |     |
|                                | 5'-GCAAGGAGGAGAGAAAGCAACAC-3'        | Exon 11                   | J5      | 277 | B   |
|                                | 5'-GTCACCGACAGAAAGGCATTATG-3'        | Exon 11                   |         |     |     |
|                                | AK048184                             | 5'-TGAAGCAGCACCCCTTGAAC-3 | Exon 11 | J6  | 220 |
| 5'-CCGTGGGCAAAGAAAATAACAGTC-3' |                                      | Exon 11                   |         |     |     |
| AK048652                       | 5'-CATTGGTTGCCAGAACTACACTG-3'        | Exon 3                    | K1      | 323 | B   |
|                                | 5'-TCAGGTGACCATCCAACAGCAC-3'         | Exon 3                    |         |     |     |
| AK137852                       | 5'-GAGTCTCTGTGTTGGCAAATGAATC-3'      | Exon 1                    | L1      | 216 | B   |
|                                | 5'-TTGTGGGAGGCACTGGGTAGATGAAC-3'     | Exon 1                    |         |     |     |
| AK081689                       | 5'-GGCTAGACGGTGACAAGGCAATC-3'        | Exon 1                    | M1      | 233 | B   |
|                                | 5'-ATGGAACATGGAACTCCCTGAAG-3'        | Exon 1                    |         |     |     |
| AK047825                       | 5'-GACGCTCTCTCCTGGATTCTGTAG-3'       | Exon 1                    | N1      | 233 | B   |
|                                | 5'-AAGTCGGCTTCTGGCAACACAC-3'         | Exon 1                    |         |     |     |
| AK016367                       | 5'- TGAAGGCTGGCTGGAAGATG -3'         | Exon 1                    | O1      | 174 | B   |
|                                | 5'- TGGTTGTTGGAAGAGGAGGTGG -3'       | Exon 1                    |         |     |     |
| AK016367                       | 5'-GCAGAAGGAATGAGAATGGACATC-3'       | Exon 1                    | P1      | 122 | B   |
|                                | 5'-AGTTGGCTTTTGCTGTGCTGAC-3'         | Exon 1                    |         |     |     |

**Table 4S.** *Muc19* cDNA clones. Overlapping clones cover sequence from exon 1 to the 5'-end of exon 50. Clones from the 3'-end of exon 50 to each of two polyadenylation sites were produced by 3'-RLM RACE. PCR cycling profiles for 5'-end clones were: 95°C for 15 min followed by 40 cycles (94°C, 1 min; 55°C, 1 min; 72°C, 1 min) and a final 10 min extension at 72°C. PCR cycling profiles for 3'-end clones were: 94°C for 3 min followed by 35 cycles (94°C, 1 min; 66°C, 1 min; 72°C, 1 min) and a final 2 min extension at 72°C.

| <b>Mouse Strain</b> | <b>Forward/Reverse Primers</b>                                  | <b>Sequence Length (bp)</b> | <b>Included Exons</b> | <b>GenBank Accession Number</b> |
|---------------------|-----------------------------------------------------------------|-----------------------------|-----------------------|---------------------------------|
| <i>sld</i>          | 5'-GCCTGAACAGTCTCTACACTTAGG-3'<br>5'-TCTGCTTGCATGTACGAAGAG-3'   | 1,526                       | 1, 19-31              | HM132022                        |
| <i>sld</i>          | 5'-TGAACACTGGCGAGATGACTC-3'<br>5'-CTTGGGTCCAGGATAACTGATAC-3'    | 2,094                       | 25-41                 | HM132023                        |
| NCR & <i>sld</i>    | 5'-CGAGACCGAAGCTGTGATATAG-3'<br>5'-GGTGATGTGTGCTTGTGCTTTAC-3'   | 1,797                       | 36-50                 | HM132024                        |
| NCR & <i>sld</i>    | 5'-CCTCATCTTTCATTTCCCCATCTG-3'<br>5'-GCGAGCACAGAATTAATACGACT-3' | 974                         | 50-60                 | HM132025                        |
| NCR & <i>sld</i>    | 5'-CCTCATCTTTCATTTCCCCATCTG-3'<br>5'-GCGAGCACAGAATTAATACGACT-3' | 1,079                       | 50-60                 | HM132026                        |

**Table 5S.** Genomic clones within the *Muc19/Smgc* locus. Clones were prepared from both NFS/NCr and NFS/N-*sld* DNA. Sequences of clones from both mouse strains were identical using primer sets 1-10, whereas clones from primers sets 11-14 contain variations between the two strains. Typically 25 ng of genomic DNA was amplified with 1 Unit of Accuprime™ *Taq* high fidelity DNA polymerase using 0.25 μM primers and a cycling profile of 95°C for 5 min followed by 35 cycles (95°C, 60 sec; 55°C 60 sec; 68°C, 2-10 min) and 7 min extension at 68°C.

| Primer Set | GenBank Accession Number | Mouse Strain     | Forward/Reverse Primers                                                      | Binding Site           | Size (kb) |
|------------|--------------------------|------------------|------------------------------------------------------------------------------|------------------------|-----------|
| 1          | HM132005                 | NCr & <i>sld</i> | 5'-GGTGCATCTCTCTTGCAGCTTTC-3'<br>5'-GTGACGATCTGGGACCTAAGTGTAG-3'             | 5' Flank<br>Exon 1     | 7,762     |
| 2          | HM132006                 | NCr & <i>sld</i> | 5'-ATTGCCTTTCCTTGCTGCG-3'<br>5'-TGGTCCAGGTCCCTTGTCTC-3'                      | 5' Flank<br>Intron 5   | 6,670     |
| 3          | HM132007                 | NCr & <i>sld</i> | 5'-GCTAGGGAATACACACTGTAG-3'<br>5'-TGGTCCATGATCCTCTGTGTC-3'                   | Intron 4<br>Exon 7     | 3,080     |
| 4          | HM132008                 | NCr & <i>sld</i> | 5'-GGATCATGGACCAACAAG-3'<br>5'-GCTTTAAGATTCTCGACAGC-3'                       | Exon 7<br>Exon 10      | 3,481     |
| 5          | HM132009                 | NCr & <i>sld</i> | 5'-GGACAGAACTTGTGTCTTC-3'<br>5'-GTGACAGACTGTTGAATGTG-3'                      | Intron 9<br>Exon 13    | 4,469     |
| 6          | HM132010                 | NCr & <i>sld</i> | 5'-AAGAGAGGCAAAGAATCAGG-3'<br>5'-CTCACAAAGACTGATTCGGTAG-3'                   | Intron 12<br>Intron 13 | 2,070     |
| 7          | HM132011                 | NCr & <i>sld</i> | 5'-AAGGATGGATCTAGGTTAGGTG-3'<br>5'-GGAGAGAGTATGCTCAGAACTTGATG-3'             | Intron 13<br>Intron 14 | 1,110     |
| 8          | HM132012                 | NCr & <i>sld</i> | 5'-GAATGGCAGAAGGCATTTG-3'<br>5'-CCCAAAGATGAAGACCAAC-3'                       | Intron 14<br>Exon 18   | 4,200     |
| 9          | HM132013                 | NCr & <i>sld</i> | 5'-TAGTGGCAGAGTTACCTGTCCTACTG-3'<br>5'-TGCGGGCTTAACAATAGACTAGC-3'            | Exon 18<br>Intron 18   | 3,594     |
| 10         | HM132014                 | NCr & <i>sld</i> | 5'-CAGTGGTTGAATAGCCAGGAACAG-3'<br>5'-AGAGGGATACCTTTGGAAGCACAG-3'             | Intron 18<br>Intron 18 | 3,675     |
| 11         | HM132015                 | NCr              | 5'-GCTTCCAAAGGTATCCCTCTTAGTGAAGAC-3'<br>5'-GCCACAGACAAGCATTGAAACTGGACTATC-3' | Intron 18<br>Intron 21 | 5,559     |
| 11         | HM132016                 | <i>sld</i>       | 5'-GCTTCCAAAGGTATCCCTCTTAGTGAAGAC-3'<br>5'-GCCACAGACAAGCATTGAAACTGGACTATC-3' | Intron 18<br>Intron 21 | 5,563     |
| 12         | HM132017                 | NCr & <i>sld</i> | 5'-GGGCATTGATCCTGGAATCATCTA-3'<br>5'-CCTGGAGTACTGCAGATACCAAAT-3'             | Intron 51<br>Intron 53 | 1,763     |
| 13         | HM132018                 | NCr              | 5'-TTAAAGCATCTGGGAGGGATGGAAC-3'<br>5'-TGCAAAGATCAGACTGAAAATCGAG-3'           | Intron 52<br>Intron 56 | 3,273     |
| 13         | HM132019                 | <i>sld</i>       | 5'-TTAAAGCATCTGGGAGGGATGGAAC-3'<br>5'-TGCAAAGATCAGACTGAAAATCGAG-3'           | Intron 52<br>Intron 56 | 3,277     |
| 14         | HM132020                 | NCr              | 5'-GCCTCACATAAAAAGCAACACGAC -3'<br>5'-GACCCATAACCTCTAAAAGTGGTGC-3'           | Intron 56<br>3' Flank  | 6,486     |
| 14         | HM132021                 | <i>sld</i>       | 5'-GCCTCACATAAAAAGCAACACGAC -3'<br>5'-GACCCATAACCTCTAAAAGTGGTGC-3'           | Intron 56<br>3' Flank  | 6,488     |



**Table 6S.** Primer pairs used to PCR amplify genomic DNA from NFS/NCr and NFS/N-*sld* mice for direct sequence comparisons. Amplicons of the appropriate molecular weight were isolated and sequenced directly. Sequences of amplicons from both mouse strains were identical for each primer set. PCR reactions incorporated 25 ng genomic DNA, 1 Unit of Accuprime™ *Taq* high fidelity DNA polymerase and 0.25 μM primers with a cycling profile of 95°C for 5 min, 35 cycles (95°C, 60 sec; 55°C, 60 sec; 68°C, 2-6 min) and 5 min extension at 68°C.

| Primer Set | Forward/Reverse Primers                                               | Binding Site | Size (kb) |
|------------|-----------------------------------------------------------------------|--------------|-----------|
| 1          | 5'-CGAAGTCCCCTACTACGACTAGAACAC-3'<br>5'-GAGAGTTTGTCTTGTCTCCACTTTAG-3' | Exon 19      | 2,779     |
|            |                                                                       | Exon 22      |           |
| 2          | 5'-GCAAGGCAACCACTATTC-3'<br>5'-AAGGGCTGGGGCAGTCATTG-3'                | Exon 22      | 1,460     |
|            |                                                                       | Exon 24      |           |
| 3          | 5'-TGAGCATATTGCCAGTAGTAAG-3'<br>5'-CAAACCACAGCAGAGTCATC-3'            | Exon 24      | 3,211     |
|            |                                                                       | Exon 25      |           |
| 4          | 5'-GCAGACTACGTGTGATACCTAC-3'<br>5'-GGACTTTTCTTGGCTTGTAC-3'            | Exon 25      | 1,408     |
|            |                                                                       | Exon 28      |           |
| 5          | 5'-ACATTGGAGAGAAAGGAAAG-3'<br>5'-AGCCAAGAAGTGGCAGTC-3'                | Exon 27      | 1,746     |
|            |                                                                       | Exon 27      |           |
| 6          | 5'-GGTCTTGCACTGAAGCTCGATG-3'<br>5'-CTCCATCCTTTGTGACTGTC-3'            | Exon 28      | 3,336     |
|            |                                                                       | Exon 30      |           |
| 7          | 5'-AGGAGTTGGTTCTGTGAATGGAAG-3'<br>5'-GTGTACTTCAGACAGTTCTGCCTCC-3'     | Intron 29    | 3,290     |
|            |                                                                       | Intron 32    |           |
| 8          | 5'-AACACAGCCAATCCCCTTGC-3'<br>5'-AACTTTTCTCTTGCCCCACTTAGG-3'          | Intron 32    | 3,760     |
|            |                                                                       | Intron 35    |           |
| 9          | 5'-ACAGCAGATTGCACAGACGTTTC-3'<br>5'-CCATGACAGAAGTCAGCAGAGTTG-3'       | Exon 35      | 4,827     |
|            |                                                                       | Intron 39    |           |
| 10         | 5'-AATCAACTTGCCATGTCTACGGAG-3'<br>5'-TGACACCAGGATAACTCACACGTTTC-3'    | Exon 39      | 4,444     |
|            |                                                                       | Intron 41    |           |
| 11         | 5'-ATCACAGCAATGGTAACCCTGG-3'<br>5'-CTTAGTTCAACCCGATGGAAACC-3'         | Intron 41    | 5,938     |
|            |                                                                       | Intron 48    |           |
| 12         | 5'-GAGTCCTGCATCCAATCTGTAGTC-3'<br>5'-AGCTGAGGTCTCATTAGAGGCTGC-3'      | Intron 48    | 4,089     |
|            |                                                                       | Exon 50      |           |
| 13         | 5'-CCTCGTCCAGTGTGTCTATCTAC-3'<br>5'-GCAGGAATCATGTATGCAGTG-3'          | Exon 50      | 4,980     |
|            |                                                                       | Intron 50    |           |
| 14         | 5'-AGACTGAGCCCCGATTC-3'<br>5'-TCTAAAAGCCAGAAGGGTC-3'                  | Intron 50    | 6,117     |
|            |                                                                       | Intron 51    |           |
| 15         | 5'-CCTCTTTGTTTTCCGACTG-3'<br>5'-TTGTGACTCCAGGTGCTAC-3'                | Intron 51    | 4,981     |
|            |                                                                       | Exon 52      |           |

**Table 7S.** Primers and PCR conditions used in the production and genotyping of Muc19 KO mice. The produce homology arms and to screen ES cells and F1 mice (outside 3'-arm primer set) we used Accuprime™ High fidelity Taq DNA polymerase with PCR cycling profiles of 94°C for 2 min followed by 30-35 cycles (94°C, 1 min; 55-58°C, 1 min; 68°C, 5-13 min) and 10-20 min at 68°C.

To produce Southern probe templates, PCR reactions were run in Taq PCR Master Mix (Qiagen) for 3 min at 98°C followed by 35 cycles (94°C, 30 s; 60°C, 30 s; 74°C, 30 s) and 3 min at 72°C. PCR reactions to genotype KO mice were run in the FailSafe PCR buffer system (Epicentre). Conditions were: buffer B; 3 min at 94 °C followed by 30 cycles (94°C, 30 s; 55°C, 30 s; 72°C, 90 s) and 5 min at 72°C. The his3-dedl Region is within the STOP cassette from pBS302.

| <b>Primers to Produce Homology Arms</b>                      |                                                                                                                 |                                     |
|--------------------------------------------------------------|-----------------------------------------------------------------------------------------------------------------|-------------------------------------|
| <b>Location</b>                                              | <b>Forward/Reverse Primers</b>                                                                                  | <b>Product Size (bp)</b>            |
| 5'-Arm                                                       | 5'-GGACCCATTTGATTGCCTCG-3'<br>5'-GCTTCTGAGTATGTGGGAGTCGC-3'                                                     | 5,693                               |
| 3'-Arm                                                       | 5'-GCCCTTTGAGCAGGAGCAATG-3'<br>5'-CGAGTGTAAGTGTGCCCTGAAGTTG-3'                                                  | 4,390                               |
| <b>Primers to Screen ES Cells and F1 Mice</b>                |                                                                                                                 |                                     |
| 934 bp 5' of 5'-Arm<br>Within PGK Promoter                   | 5'-TGAGGCATCTCAAGGGTAGC-3'<br>5'-TTCCTGACTAGGGGAGGAGTAG-3'                                                      | 5,977                               |
| Within neo<br>84 bp 3' of 3'-Arm                             | 5'-TCGGCTATGACTGGGCACAACAGAC-3'<br>5'-TGGAGCACGTTGGAGGATTTGAAG-3'                                               | 5,028                               |
| <b>Primers to Produce Southern Probes</b>                    |                                                                                                                 |                                     |
| Pvu II Probe                                                 | 5'-TGCCATCTCTAATAGTTTCAGTGC-3'<br>5'-CTCTTGAAGGGGACACCCTAAACC-3'                                                | 308                                 |
| Sph I Probe                                                  | 5'-TTCGCGATTCACAAGTGTGCATG-3'<br>5'-GCACATTAATTAGCTTGGAGCAC-3'                                                  | 332                                 |
| <b>Primer Set to Genotype KO Mice</b>                        |                                                                                                                 |                                     |
| Intron 24-Deleted Region<br>In his3-dedl Region<br>In 3'-arm | For: 5'-CAGACCCCTGAGGACATTCTTG-3'<br>For: 5'-TGAGGAGGAACATAACCATTCTCG-3'<br>Rev: 5'-GGCTTGGAGTGACAGTTTGGATAC-3' | 509 (Wild Type)<br>1,263 (Muc19 KO) |

**Table 8S.** TaqMan gene expression assays. Standard assays used for evaluating transcripts in the critical interval are given, as well as a custom assay to detect *Muc19* heteronuclear RNA. In all cases, assays were performed in triplicate. Site, assay location along transcript (GenBank Accession Number in parentheses); context sequence, target sequence where TaqMan probe hybridizes (see <https://products.appliedbiosystems.com/> for more information); Exons, exons in which the primers bind; Amp, amplicon length in base pairs; *Lrrk2*, leucine-rich repeat kinase 2; *Muc19*, mucin 19; *Smgc*, submandibular gland protein C; *Cntn1*, contactin 1; *Actb*, beta actin; *Hprt1*, hypoxanthine guanine phosphoribosyl transferase 1; *Rn18s*, 18S ribosomal RNA.

| <b>Standard TaqMan Assays</b> |                 |              |             |                                 |            |
|-------------------------------|-----------------|--------------|-------------|---------------------------------|------------|
| <b>Transcript</b>             | <b>Assay ID</b> | <b>Exons</b> | <b>Site</b> | <b>Context Sequence</b>         | <b>Amp</b> |
| <i>Muc19</i><br>(NM_207243)   | Mm01306462_m1   | 51-52        | 21,866      | 5'-ACCAGTATGCCAGCTTCCACCTCGG-3' | 82         |
| <i>Smgc</i><br>(NM_198927)    | Mm01303795_g1   | 17-18        | 2,091       | 5'-GTGACTCAGGAAGCCATAATTTGTC-3' | 93         |
| <i>Lrrk2</i><br>(NM_025730)   | Mm00481934_m1   | 47-48        | 7,027       | 5'-AAAACCAACCAGCTGTTTTCTTACG-3' | 88         |
| <i>Cntn1</i><br>(NM_007727)   | Mm00514374_m1   | 23-24        | 3,233       | 5'-AAGTCAAAATTCAGGCGTGTCCAC-3'  | 64         |
| <i>Actb</i><br>(NM_007393)    | Mm00607939_s1   | 6-6          | 1,230       | 5'-TACTGAGCTGCGTTTTACACCCTTT-3' | 115        |
| <i>Hprt1</i><br>(NM_013556)   | Mm00446968_m1   | 6-7          | 630         | 5'-GTTAAGGTTGCAAGCTTGCTGGTGA-3' | 65         |
| <i>B2m</i><br>(NM_009735)     | Mm00437762_m1   | 1-2          | 117         | 5'-GTATGCTATCCAGAAAACCCCTCAA-3' | 77         |
| <i>Rn18s</i><br>(NR_003278)   | Hs99999901_s1   | 1-1          | 609         | 5'-TGGAGGGCAAGTCTGGTGCCAGCAG-3' | 187        |

| <b>Custom TaqMan Assay to <i>Muc19</i> Heteronuclear RNA</b> |                                    |                            |            |
|--------------------------------------------------------------|------------------------------------|----------------------------|------------|
| <b>Assay ID</b>                                              | <b>Location</b>                    | <b>Context Sequence</b>    | <b>Amp</b> |
| MUC19HNRNA-MU19                                              | Intron 19 - Exon 20                | 5'-TCAACACAAGAGAGAAATAA-3' | 93         |
| <b>Forward Primer</b>                                        | 5'-CCTTGGGAATACAATTTGAATCAATGCA-3' |                            |            |
| <b>Reverse Primer</b>                                        | 5'-GCTTCTGGAACATGGGATGCTT-3'       |                            |            |

| <b>Primers to Prepare Standard Templates for each TaqMan Assay</b> |                                                                       |
|--------------------------------------------------------------------|-----------------------------------------------------------------------|
| <b>Transcript</b>                                                  | <b>Forward/Reverse Primers</b>                                        |
| <i>Muc19</i>                                                       | 5'-TTCATTTCCCATCTGGACATC-3'<br>5'-GTCTGGACACTCTGGCTGAGATATG-3'        |
| <i>Smgc</i>                                                        | 5'-TAATGCACAATCAAGCAACAAC-3'<br>5'-AATTATGGCTTCCTGAGTCACTC-3'         |
| <i>Lrrk2</i>                                                       | 5'-AGGGTGTGGCACAAAGGTCTTC-3'<br>5'-TGGCAATATACAGGGCTGTGTCTAC-3'       |
| <i>Cntn1</i>                                                       | 5'-CGAGTAGACAAGAAAGCCAAGGGAG-3'<br>5'-TTCCGAGTAGACAAGAAAGCCAAG-3'     |
| <i>Actb</i>                                                        | 5'-GGCTGCTTTGCTTTCAGTTTTGTAG-3'<br>5'-CCCAGTTACTAAGTGGTTTTTTTTGCTT-3' |
| <i>Hprt1</i>                                                       | 5'-TGGAAAGAATGTCTTGATTG-3'<br>5'-CTTGTCTGGAATTTCAAATC-3'              |
| <i>Rn18s</i>                                                       | 5'-ACGGCTACCACATCCAAGGAAG-3'<br>5'-GGACACTCAGCTAAGAGCATCGAG-3'        |
| <i>Muc19 hnRNA</i>                                                 | 5'-GGAACACGACATTTAGCGTCTCAC-3'<br>5'-CTGGAACATGGGATGCTTTTTTC-3'       |

**Table 9S.** Primer pairs to create minigenes and for detecting spliced and unspliced products from minigenes and in sublingual glands. PCR reactions to create minigenes incorporated 25 ng genomic DNA, 1 Unit of Accuprime *Taq* high fidelity DNA polymerase and 0.25  $\mu$ M primers with a cycling profile of 95°C for 5 min, 35 cycles (95°C, 60 sec; 55°C, 60 sec; 68°C, 2 min) and 2 min final extension at 68°C.

PCR reactions to detect splicing products used random-primed cDNA (5 ng or more) as template and 1 Unit of Accuprime *Taq* high fidelity DNA polymerase and 0.25  $\mu$ M primers. Cycling profiles were 94C for 5 min followed by 25-30 cycles (94°C, 1 min; 60-62°C, 3 min; 68°C, 1 min) with 5 min final extension at 68°C.

To detect neo and  $\beta$ -actin cDNA we used a cycling profile of 94°C for 3 min followed by 30 cycles (94°C, 30 sec; 56°C 30 sec; 68°C, 2 min) with no final extension.

Cycling conditions for SYBR Green qPCR assays (20  $\mu$ l reactions) for correctly and aberrantly spliced *Muc19* transcripts using primers F4/R4 and F5/R5, respectively, and *Actb* primers (endogenous control) were 95°C for 10 min followed by 40 cycles (95°C, 15 sec; 60°C, 1 min; 68°C, 1 min). These same primers were used to prepare standard templates for quantification of copy numbers per reaction.

| <b>Primer pairs to create minigenes</b>                                                                      |                                      |                                        |
|--------------------------------------------------------------------------------------------------------------|--------------------------------------|----------------------------------------|
| <b>Genomic Location</b>                                                                                      | <b>Forward/Reverse Primers</b>       |                                        |
| Intron 52                                                                                                    | 5'-ACCTTGAGAGGCTAACCTGTGTT-3'        |                                        |
| Intron 55                                                                                                    | 5'-CGTATTTAGTTCATCTGGTGTGTTACA-3'    |                                        |
| Intron 56                                                                                                    | 5'-CCCCACTTAACTTGCAGATT-3'           |                                        |
| Intron 58                                                                                                    | 5'-TATTTTTCTATATACAGAAGTCAACTTACA-3' |                                        |
| <b>Top Strand of 99 bp Inserted into Multiple Cloning Site of pEGFP-N3</b>                                   |                                      |                                        |
| 5'-TTAGCTAGCTACCGACTCAGACAACCTTCTCGAGAAAGAATCTTAGTC<br>CTGCTACTGGTGGCTCTGCAACACAACAGTCTAATTTAGATGGATCCTCC-3' |                                      |                                        |
| <b>Primers for PCR of cDNA from expressed minigenes and in sublingual glands</b>                             |                                      |                                        |
| <b>Primer ID</b>                                                                                             | <b>Genomic Location</b>              | <b>Forward/Reverse Primers</b>         |
| F1                                                                                                           | Exon 2                               | 5'-GAGTCTGGTGGGAGCAAAGATTAC-3'         |
| R1                                                                                                           | EGFP                                 | 5'-ACGTTGTGGCTGTTGTAGTTGTACTC-3'       |
| F2                                                                                                           | Exon 57                              | 5'-GGTTCATCCTTTGATGACCCAAG-3'          |
| R2                                                                                                           | Exon 58                              | 5'-TTATTTGAATCGTAGATTCTCTCTTC-3'       |
| F3                                                                                                           | Exon 53                              | 5'-GTGTCCAGACTCACTCCCACCAAC-3'         |
| R3                                                                                                           | Exon 55                              | 5'-TTTTTCGGTACAGGTACACTGATG-3'         |
| F4                                                                                                           | Exons 51/52                          | 5'-GAACCACCAGTATGCCAGCTT-3'            |
| R4                                                                                                           | Exons 55/54                          | 5'-TACGTCCCCAGGAGATTTCTCT-3'           |
| F5                                                                                                           | Exons 50/51                          | 5'-CCTTCAGTCATTAACAGGAGGGACGACT-3'     |
| R5                                                                                                           | Intron 54/Exon 54                    | 5'-GAGAGACCAGAAGTGCATGCTTACAGATTTCT-3' |
| F6                                                                                                           | Exon 1                               | 5'-GATCGTCACCATGAAGCTGATA-3'           |
| R6                                                                                                           | Exons 22/21                          | 5'-GTGGCTATAAAGAATGAGTGAGAGT-3'        |
| Neo-F                                                                                                        | <i>neo</i>                           | 5'-GATCTGGACGAAGAGCATCAG-3'            |
| Neo-R                                                                                                        | <i>neo</i>                           | 5'-CCATGATATTCGGCAAGCAG-3'             |
| $\beta$ -actin-F                                                                                             | <i>Actb</i> Exon 1                   | 5'-GAGCACAGCTTCTTTGCAGCTC-3'           |
| $\beta$ -actin-R                                                                                             | <i>Actb</i> Exon 3                   | 5'-CACCCACATAGGAGTCCCTTCTGAC-3'        |
